# Supplementary material for: Cytotoxicity of silver(i), gold(i) and gold(iii) complexes of a pyridine wingtip substituted annelated N-heterocyclic carbene
Source: Royal Society of Chemistry journal article supplement (doi:10.1039/c4ra09591j), 2014-01-01
Supplement: c4ra09591j1.pdf [file c4ra09591j1.pdf]

## Cytotoxicity of Silver(I), Gold(I) and Gold(III) Complexes of a Pyridine Wingtip Substituted Annelated N-Heterocyclic Carbene

Joydev Dinda,<sup>\*a,c</sup> Abhishek Nandy,<sup>b</sup> Bidyut Kumar Rana,<sup>c</sup> Valerio Bertolasi,<sup>d</sup> Krishna Das Saha,<sup>\*b</sup> Christopher W. Bielawski<sup>e,f</sup>

<sup>a</sup> Department of Chemistry, ITM University-Gwalior, Gwalior-474001, M.P., India.

<sup>b</sup> Cancer Biology and Inflammatory Disorder Division, CSIR-Indian Institute of Chemical Biology, Jadavpur, Kolkata- 700032, West Bengal, India

<sup>c</sup> School of Applied Science, "Applied Synthetic Chemical Research Laboratory", Haldia Institute of Technology, Haldia- 721657, Purba Medinipur, West Bengal, India

<sup>d</sup> Dipartimento di Chimica and Centro di Strutturistica Diffrattometrica, Universita' di Ferrara, Via L. Borsari, 46, Italy

<sup>e</sup> Department of Chemistry, University of Texas at Austin, 1 University Station, A1590, Austin, TX 78712 USA

<sup>f</sup> Department of Chemistry, Ulsan National Institute of Science and Technology (UNIST), Ulsan, 689-798, Korea

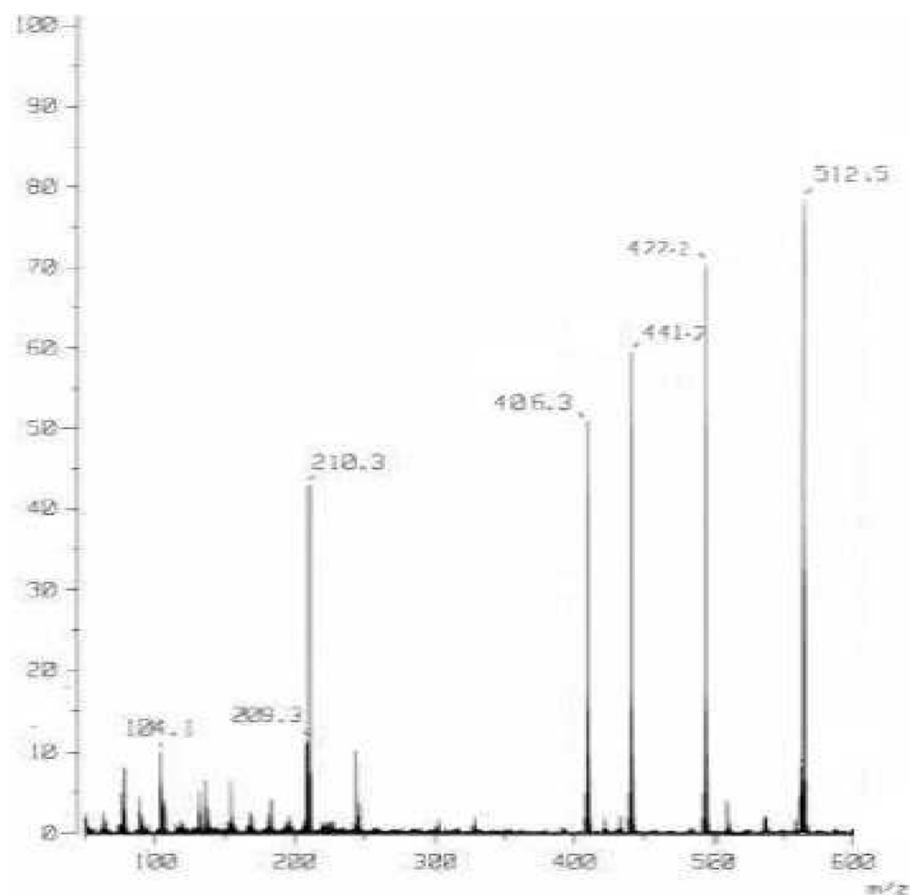

**Fig. S1.** FAB+ mass spectra of complex 4.
